# Supplementary material for: Metadichol®: A Novel Nanolipid Formulation That Inhibits SARS-CoV-2 and a Multitude of Pathological Viruses In Vitro
Source: Biomed Res Int. 2022 Jan 15;2022:1558860. doi: 10.1155/2022/1558860 (PMC8760534; doi:10.1155/2022/1558860)
Supplement: Supplementary Materials — Describes the neutralization assays of Metadichol performed with HEK 293T-ACE2, a human embryonic kidney cell line 00overexpressing ACE2, the receptor of the SARS-CoV-2 0virus. [file 1558860.f1.zip]

Archive with 2 entries (2 files):
- Description-supplementary material.pdf
- Supplementay-material.pdf
